# Supplementary material for: COVID-19 Vaccine Hesitancy and Emerging Variants: Evidence from Six Countries
Source: MDPI journal article supplement (doi:10.3390/bs11110148), 2021-10-28
Supplement: s1 [file s1]

## Supplement tables

Table S1(a). Descriptive summary of COVID-19 variants knowledge.

| Knowledge Questions on COVID-19 Variants (n=781)                                                | Yes |       | No  |       | Do not know /Not sure |       |
|-------------------------------------------------------------------------------------------------|-----|-------|-----|-------|-----------------------|-------|
|                                                                                                 | n   | %     | n   | %     | n                     | %     |
| • Are you aware that there are new variants of COVID-19?                                        | 722 | 92.45 | 59  | 7.55  | -                     | -     |
| • How many current strains of COVID-19 are you aware of?                                        |     |       |     |       |                       |       |
| 1                                                                                               | 60  | 7.68  | -   | -     | -                     | -     |
| 2                                                                                               | 185 | 23.69 | -   | -     | -                     | -     |
| 3                                                                                               | 215 | 27.53 | -   | -     | -                     | -     |
| More than 3                                                                                     | 321 | 41.10 | -   | -     | -                     | -     |
| • Which among the following are the new variants of COVID-19? (Select all that apply)           |     |       |     |       | 542                   | 69.40 |
| One correct                                                                                     | 117 | 14.98 | -   | -     |                       |       |
| Two correct                                                                                     | 48  | 6.15  | -   | -     |                       |       |
| Three correct                                                                                   | 47  | 6.02  | -   | -     |                       |       |
| All correct                                                                                     | 27  | 3.46  | -   | -     |                       |       |
| • What countries are the new variants from? (Select all that apply)                             |     |       |     |       | 108                   | 13.83 |
| One correct                                                                                     | 292 | 37.39 | -   | -     |                       |       |
| Two correct                                                                                     | 152 | 19.46 | -   | -     |                       |       |
| Three correct                                                                                   | 155 | 19.85 | -   | -     |                       |       |
| Four correct                                                                                    | 57  | 7.30  | -   | -     |                       |       |
| All correct                                                                                     | 17  | 2.18  | -   | -     |                       |       |
| • Do you think the new variants spread faster/more contagious?                                  | 631 | 80.79 | 28  | 3.59  | 122                   | 15.62 |
| • Will these new variants cause different symptoms?                                             | 431 | 55.19 | 156 | 19.97 | 194                   | 24.84 |
| • What symptoms do you expect to notice with the new COVID-19 variants? (Select all that apply) |     |       |     |       |                       |       |
| Cough                                                                                           | 559 | 71.57 | -   | -     | -                     | -     |
| Fatigue/weakness                                                                                | 566 | 72.47 | -   | -     | -                     | -     |
| Headache                                                                                        | 547 | 70.04 | -   | -     | -                     | -     |
| Muscle aches                                                                                    | 523 | 66.97 | -   | -     | -                     | -     |
| Sore throat                                                                                     | 502 | 64.28 | -   | -     | -                     | -     |
| Fever                                                                                           | 603 | 77.21 | -   | -     | -                     | -     |
| Loss of taste                                                                                   | 514 | 65.81 | -   | -     | -                     | -     |
| Loss of smell                                                                                   | 534 | 68.37 | -   | -     | -                     | -     |
| Other (Abdominal pain, Breathlessness, Vomiting, Diarrhoea)                                     | 23  | 2.94  | -   | -     | -                     | -     |

|                                                                                              |     |       |     |       |     |       |
|----------------------------------------------------------------------------------------------|-----|-------|-----|-------|-----|-------|
| • What measures are necessary to prevent the spread of new variants? (Select all that apply) |     |       |     |       | 24  | 3.07  |
| One correct                                                                                  | 43  | 5.51  | -   | -     |     |       |
| Two correct                                                                                  | 26  | 3.33  | -   | -     |     |       |
| Three correct                                                                                | 100 | 12.80 | -   | -     |     |       |
| Four correct                                                                                 | 201 | 25.74 | -   | -     |     |       |
| All correct                                                                                  | 387 | 49.55 | -   | -     |     |       |
| • Do you think current diagnostic tests are able to detect the new variants?                 | 448 | 57.36 | 115 | 14.72 | 218 | 27.91 |
| • What is your source of information on new strains of COVID-19? (Select all that apply)     |     |       |     |       |     |       |
| Radio                                                                                        | 101 | 12.93 | -   | -     | -   | -     |
| TV                                                                                           | 420 | 53.78 | -   | -     | -   | -     |
| Newspaper                                                                                    | 242 | 30.99 | -   | -     | -   | -     |
| Social media (Twitter, Facebook, Instagram, YouTube etc.)                                    | 516 | 66.07 | -   | -     | -   | -     |
| Internet (WHO, FDA, CDC websites)                                                            | 456 | 58.39 | -   | -     | -   | -     |
| Relatives and friends                                                                        | 187 | 23.94 | -   | -     | -   | -     |

Table S1(b). Descriptive summary of COVID-19 vaccine knowledge.

| Knowledge about COVID-19 Vaccine                                     | Yes |       | No  |       | Not taken |       |
|----------------------------------------------------------------------|-----|-------|-----|-------|-----------|-------|
|                                                                      | n   | %     | n   | %     | n         | %     |
| • Have you received the COVID-19 vaccine yet?                        | 393 | 50.32 |     |       | 388       | 49.68 |
| • If yes, how many doses of the COVID-19 vaccine did you receive?    |     |       |     |       |           |       |
| One                                                                  | 77  | 19.59 | -   | -     | -         | -     |
| Two                                                                  | 316 | 80.41 | -   | -     | -         | -     |
| • Which vaccine did you receive?                                     |     |       |     |       |           |       |
| Pfizer                                                               | 160 | 40.71 | -   | -     | -         | -     |
| Moderna                                                              | 16  | 4.07  | -   | -     | -         | -     |
| Johnson & Johnson                                                    | 5   | 1.27  | -   | -     | -         | -     |
| Sinopharm                                                            | 7   | 1.78  | -   | -     | -         | -     |
| Sinovac                                                              | 12  | 3.05  | -   | -     | -         | -     |
| Covaxin                                                              | 6   | 1.53  | -   | -     | -         | -     |
| Covishield                                                           | 185 | 47.07 | -   | -     | -         | -     |
| Other                                                                | 2   | 0.51  | -   | -     | -         | -     |
| • Have you experienced any side effects after taking a vaccine shot? | 242 | 61.58 | 151 | 38.42 | -         | -     |

|                                                                                        |     |       |     |       |   |   |
|----------------------------------------------------------------------------------------|-----|-------|-----|-------|---|---|
| • If yes, what are the side effects experienced?                                       |     |       |     |       |   |   |
| Vaccination site discomfort (pain/redness/swelling)                                    | 160 | 66.12 | -   | -     | - | - |
| Tiredness                                                                              | 112 | 46.28 | -   | -     | - | - |
| Headache                                                                               | 97  | 40.08 | -   | -     | - | - |
| Muscle pain                                                                            | 121 | 50.00 | -   | -     | - | - |
| Chills                                                                                 | 44  | 18.18 | -   | -     | - | - |
| Fever                                                                                  | 102 | 42.15 | -   | -     | - | - |
| Nausea                                                                                 | 13  | 5.37  | -   | -     | - | - |
| Other                                                                                  | 0   | 0.00  | -   | -     | - | - |
| • Did you get a COVID-19 infection after getting vaccinated?                           | 70  | 17.81 | 52  | 13.23 | - | - |
| • Did anyone in your family/friends get a COVID-19 infection after getting vaccinated? | 20  | 2.56  | 368 | 47.12 | - | - |

Table S2. Descriptive summary of attitude towards COVID-19 vaccine

| Attitude towards COVID-19 Vaccines                                                                        | Completely disagree |       | Somewhat disagree |       | Neutral |       | Somewhat agree |       | Completely agree |       |
|-----------------------------------------------------------------------------------------------------------|---------------------|-------|-------------------|-------|---------|-------|----------------|-------|------------------|-------|
|                                                                                                           | n                   | %     | n                 | %     | n       | %     | n              | %     | n                | %     |
| The COVID-19 vaccines are safe.                                                                           | 39                  | 4.99  | 70                | 8.96  | 203     | 25.99 | 192            | 24.58 | 277              | 35.47 |
| The COVID-19 vaccines contain dangerous ingredients.                                                      | 343                 | 43.92 | 145               | 18.57 | 216     | 27.66 | 49             | 6.27  | 28               | 3.59  |
| Worried about the serious side effects from the COVID-19 vaccine.                                         | 237                 | 30.35 | 130               | 16.65 | 197     | 25.22 | 152            | 19.46 | 65               | 8.32  |
| Don't have enough information about the COVID-19 vaccine to decide whether to get it myself.              | 333                 | 42.64 | 118               | 15.11 | 167     | 21.38 | 89             | 11.40 | 74               | 9.48  |
| Waiting to get the vaccine because it's new.                                                              | 245                 | 31.37 | 106               | 13.57 | 193     | 24.71 | 123            | 15.75 | 114              | 14.60 |
| The COVID-19 vaccines are effective at preventing COVID-19 infection.                                     | 106                 | 13.57 | 110               | 14.08 | 217     | 27.78 | 202            | 25.86 | 146              | 18.69 |
| There are more effective ways to prevent COVID-19 than a vaccine.                                         | 201                 | 25.74 | 160               | 20.49 | 230     | 29.45 | 111            | 14.21 | 79               | 10.12 |
| Contracting COVID-19 provides better immunity than a vaccine.                                             | 216                 | 27.66 | 150               | 19.21 | 244     | 31.24 | 109            | 13.96 | 62               | 7.94  |
| Reports on social media have made to reconsider choice to receive the COVID-19 vaccine.                   | 268                 | 34.31 | 94                | 12.04 | 214     | 27.40 | 119            | 15.24 | 86               | 11.01 |
| Read reports in the mainstream media that have made to reconsider choice to receive the COVID-19 vaccine. | 279                 | 35.72 | 85                | 10.88 | 214     | 27.40 | 124            | 15.88 | 79               | 10.12 |

|                                                                |     |       |    |      |     |       |    |      |    |      |
|----------------------------------------------------------------|-----|-------|----|------|-----|-------|----|------|----|------|
| Religious leaders have advocated against COVID-19 vaccination. | 428 | 54.80 | 66 | 8.45 | 210 | 26.89 | 40 | 5.12 | 37 | 4.74 |
|----------------------------------------------------------------|-----|-------|----|------|-----|-------|----|------|----|------|

Table S3. Descriptive summary of practices towards COVID-19.

| Practices related to COVID-19                                                                        | Always/Yes/Very comfortable |       | Occasionally/No/Maybe/Comfortable |       | Never/No/Neutral |       | Uncomfortable |      | Very uncomfortable |      |
|------------------------------------------------------------------------------------------------------|-----------------------------|-------|-----------------------------------|-------|------------------|-------|---------------|------|--------------------|------|
|                                                                                                      | n                           | %     | n                                 | %     | n                | %     | n             | %    | n                  | %    |
| Avoided touching your nose, mouth, and eyes with your hands unwashed in the last 3 months            | 261                         | 33.42 | 423                               | 54.16 | 97               | 12.42 | -             | -    | -                  | -    |
| Avoided going to any crowded places in last 3 months                                                 | 338                         | 43.28 | 376                               | 48.14 | 67               | 8.58  | -             | -    | -                  | -    |
| Travelled outside your country in last 3 months                                                      | 53                          | 6.79  | 723                               | 92.57 | 5                | 0.64  | -             | -    | -                  | -    |
| Willing to avoid unnecessary travel (Domestic/International) due to the rapid spread of new variants | 569                         | 72.86 | 116                               | 14.85 | 96               | 12.29 | -             | -    | -                  | -    |
| Shared knowledge on new variants with family/friends/peers                                           | 333                         | 42.64 | 298                               | 38.16 | 150              | 19.21 | -             | -    | -                  | -    |
| Comfortable in sharing your knowledge on COVID-19 variants with your family/friends/peer             | 239                         | 30.60 | 257                               | 32.91 | 221              | 28.30 | 61            | 7.81 | 3                  | 0.38 |

## Appendix

# COVID-19 Vaccine Hesitancy and Emerging Variants: Evidence from Six Countries

## DEMOGRAPHICS:

1. Your sex (*check one*): ☐ Male ☐ Female

2. Your age (*in years*): \_\_\_\_\_
3. What is your nationality? \_\_\_\_\_ (*Please specify*)
4. Which country do you live in? \_\_\_\_\_ (*Please specify*)
5. Which state do you live in? \_\_\_\_\_ (*Please specify*)
6. What is the highest level of education that you have completed?
- ☐ Did not complete grade school
  - ☐ Grade school
  - ☐ Junior high or middle school
  - ☐ Some high school
  - ☐ High school graduate
  - ☐ Trade or technical school
  - ☐ Some college
  - ☐ College graduate
  - ☐ Post-college (graduate school)
7. What is your current employment status?
- ☐ Employed full time
  - ☐ Employed part-time
  - ☐ Unemployed (currently looking for work)
  - ☐ Unemployed (currently not looking for work)
  - ☐ Student
  - ☐ Home-maker
  - ☐ Retired
  - ☐ Self-employed
  - ☐ Unable to work
  - ☐ Other \_\_\_\_\_ (*Please specify*)
8. What is your current occupation? \_\_\_\_\_ (*Please specify*)

### KNOWLEDGE

1. Are you aware that there are new variants of COVID-19?
- ☐ Yes (If yes move to next question)
  - ☐ No
2. How many current strains of COVID-19 are you aware of?
- ☐ 1
  - ☐ 2

- ☐ 3
- ☐ More than 3
- 3. Which among the following are the new variants of COVID-19? (Select all that apply)
  - ☐ B.1.1.7 lineage
  - ☐ B.1.351 lineage
  - ☐ P.1 lineage
  - ☐ B.1.617 lineage
  - ☐ Don't know/Not sure
- 4. What countries are the new variants from? (Select all that apply)
  - ☐ UK
  - ☐ South Africa
  - ☐ Brazil
  - ☐ US
  - ☐ India
  - ☐ Don't know/Not sure
- 5. Do you think the new variants spread faster/more contagious?
  - ☐ Yes
  - ☐ No
  - ☐ Don't know/Not sure
- 6. Will these new variants cause different symptoms?
  - ☐ Yes
  - ☐ No
  - ☐ Don't know/Not sure
- 7. What symptoms do you expect to notice with the new COVID-19 variants? (Select all that apply)
  - ☐ Cough
  - ☐ Fatigue/weakness
  - ☐ Headache
  - ☐ Muscle aches
  - ☐ Sore throat
  - ☐ Fever
  - ☐ Loss of taste
  - ☐ Loss of smell
  - ☐ Other\_\_\_\_\_
- 8. What measures are necessary to prevent the spread of new variants? (Select all that apply)
  - ☐ Masking/Double masking
  - ☐ Washing hands frequently

- ☐ Ventilating indoor spaces
  - ☐ Staying 6feet apart from others
  - ☐ Avoiding crowds
  - ☐ Don't know/Not sure
9. Do you think current diagnostic tests can detect the new variants?
- ☐ Yes
  - ☐ No
  - ☐ Don't know/Not sure
10. What is your source of information on new strains of COVID-19? (Select all that apply)
- ☐ Radio
  - ☐ TV
  - ☐ Newspaper
  - ☐ Social media (Twitter, Facebook, Instagram, YouTube, etc.)
  - ☐ Internet (WHO, FDA, CDC websites)
  - ☐ Relatives and friends
  - ☐ Others \_\_\_\_\_ (please specify)

### **Vaccination status**

1. Have you received the COVID-19 vaccine yet?
- ☐ Yes
  - ☐ No

If yes,

2. How many doses of the COVID-19 vaccine did you receive?
- ☐ One
  - ☐ Two
3. Which vaccine did you receive?
- ☐ Pfizer
  - ☐ Moderna
  - ☐ Johnson & Johnson
  - ☐ Sinopharm
  - ☐ Sinovac
  - ☐ Covaxin

- ☐ Covishield
  - ☐ Others \_\_\_\_\_ (please specify)
4. Have you experienced any side effects after taking a vaccine shot?
- ☐ Yes
  - ☐ No
- If yes....
5. What are the side effects experienced?
- ☐ Vaccination site discomfort (pain/redness/swelling)
  - ☐ Tiredness
  - ☐ Headache
  - ☐ Muscle pain
  - ☐ Chills
  - ☐ Fever
  - ☐ Nausea
  - ☐ Others \_\_\_\_\_ (please specify)
6. Did you get a COVID-19 infection after getting vaccinated?
- ☐ Yes
  - ☐ No
7. Did anyone in your family/friends get a COVID-19 infection after getting vaccinated?
- ☐ Yes
  - ☐ No

### ATTITUDES & BELIEF

| Perceived Safety                | Completely Disagree      | Somewhat Disagree        | Neutral                  | Somewhat Agree           | Completely Agree         |
|---------------------------------|--------------------------|--------------------------|--------------------------|--------------------------|--------------------------|
| The COVID-19 vaccines are safe. | <input type="checkbox"/> |



|                                                                                                |                          |                          |                          |                          |                          |
|------------------------------------------------------------------------------------------------|--------------------------|--------------------------|--------------------------|--------------------------|--------------------------|
| The COVID-19 vaccines contain dangerous ingredients.                                           | <input type="checkbox"/> |
| I am worried about the serious side effects of the COVID-19 vaccine.                           | <input type="checkbox"/> |
| I don't have enough information about the COVID-19 vaccine to decide whether to get it myself. | <input type="checkbox"/> |
| The COVID-19 vaccine is so new that I want to wait a while before deciding if I should get it. | <input type="checkbox"/> |

| Perceived Effectiveness                                               | Completely Disagree      | Somewhat Disagree        | Neutral                  | Somewhat Agree           | Completely Agree         |
|-----------------------------------------------------------------------|--------------------------|--------------------------|--------------------------|--------------------------|--------------------------|
| The COVID-19 vaccines are effective at preventing COVID-19 infection. | <input type="checkbox"/> |
| There are more effective ways to prevent COVID-19 than a vaccine.     | <input type="checkbox"/> |
| Contracting COVID-19 provides better immunity than a vaccine.         | <input type="checkbox"/> |

| Community Involvement                                                                                                     | Completely Disagree      | Somewhat Disagree        | Neutral                  | Somewhat Agree           | Completely Agree         |
|---------------------------------------------------------------------------------------------------------------------------|--------------------------|--------------------------|--------------------------|--------------------------|--------------------------|
| I have heard/read reports on social media that have made me reconsider my choice to receive the COVID-19 vaccine.         | <input type="checkbox"/> |
| I have heard/read reports in the mainstream media that have made me reconsider my choice to receive the COVID-19 vaccine. | <input type="checkbox"/> |
| My religious leaders have advocated against COVID-19 vaccination.                                                         | <input type="checkbox"/> |

## PRACTICE

- In the past 3 months, have you avoided touching your nose, mouth, and eyes with your hands unwashed?
  - ☐ Always
  - ☐ Occasionally

- ☐ Never
- 2. In the past 3 months, have you avoided going to any crowded places?
  - ☐ Always
  - ☐ Occasionally
  - ☐ Never
- 3. In the past 3 months, have you traveled outside your country?
  - ☐ Yes
  - ☐ No
  - ☐ Prefer not to disclose
- 4. Due to the rapid spread of new variants, are you willing to avoid unnecessary travel (Domestic/International)?
  - ☐ Always
  - ☐ Occasionally
  - ☐ Never
- 5. In recent days, have you shared your knowledge on new variants with family/friends/peers?
  - ☐ Always
  - ☐ Occasionally
  - ☐ Never
- 6. How comfortable are you in sharing your knowledge on COVID-19 variants with your family/friends/peers?
  - ☐ Very comfortable
  - ☐ Comfortable
  - ☐ Neutral
  - ☐ Uncomfortable
  - ☐ Very uncomfortable

**Thank you for your kind participation in this survey.**
